# Supplementary material for: Forecasting tropical cyclone tracks in the northwestern Pacific based on a deep-learning model
Source: Copernicus journal article supplement (doi:10.5194/gmd-16-2167-2023), 2023-04-20
Supplement: Supplementary file 1 [file gmd-16-2167-2023-supplement.pdf]

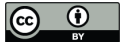

*Supplement of*

## **Forecasting tropical cyclone tracks in the northwestern Pacific based on a deep-learning model**

**Liang Wang et al.**

*Correspondence to:* Zhiqiu Gao (zgao@mail.iap.ac.cn)

The copyright of individual parts of the supplement might differ from the article licence.

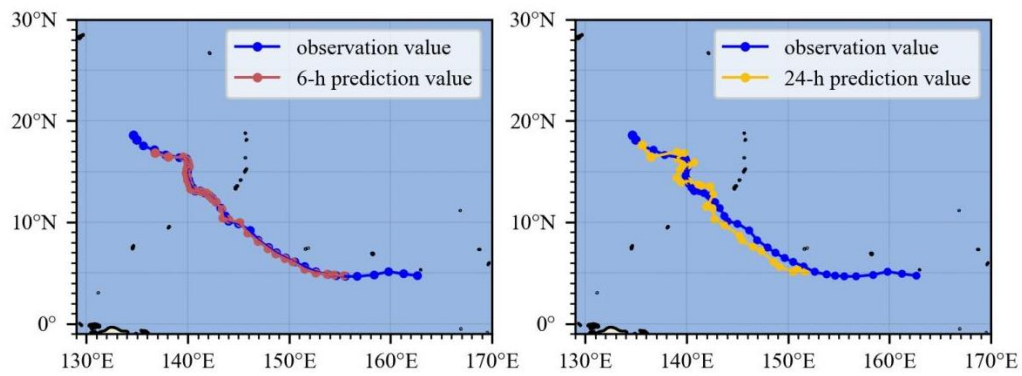

**Fig. S1: Forecast tracks of Tropical Cyclone WUTIP (1902) (left: 6 h, right: 24 h).**

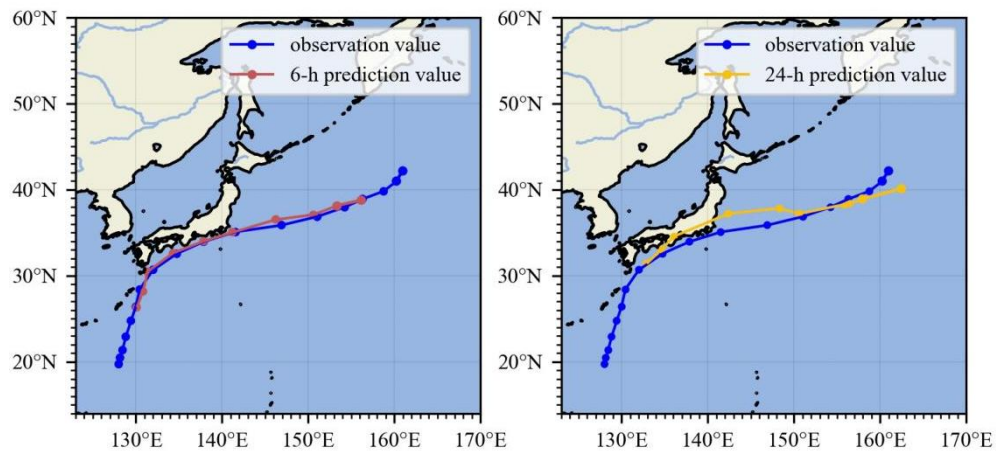

**Fig. S2: Forecast tracks of Tropical Cyclone SEPAT (1903) (left: 6 h, right: 24 h).**

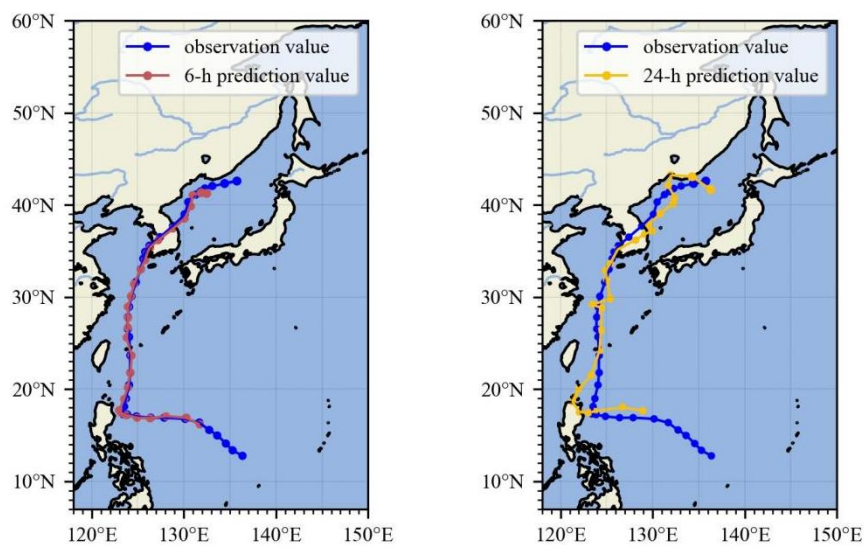

**Fig. S3: Forecast tracks of Tropical Cyclone DANAS (1905) (left: 6 h, right: 24 h).**

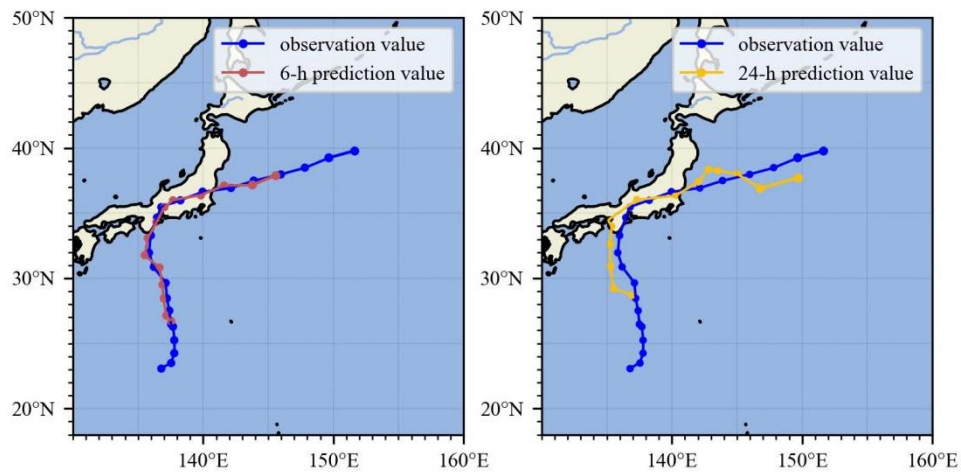

Fig. S4: Forecast tracks of Tropical Cyclone NARI (1906) (left: 6 h, right: 24 h).

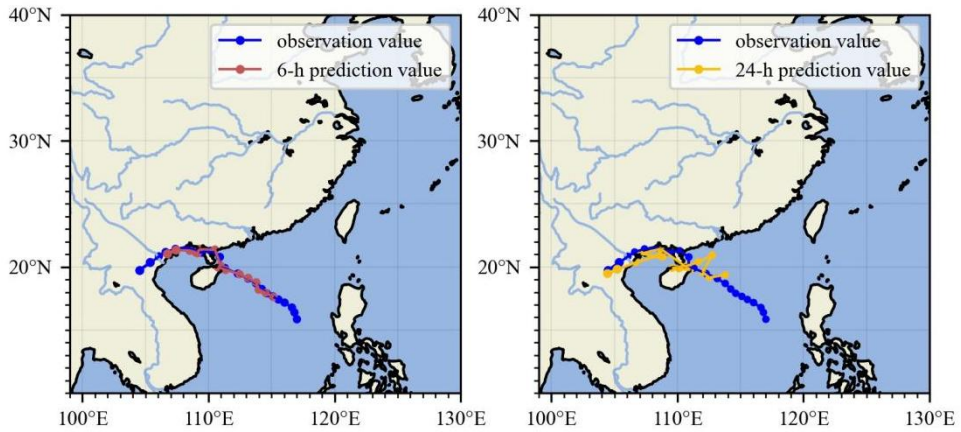

Fig. S5: Forecast tracks of Tropical Cyclone WIPHA (1907) (left: 6 h, right: 24 h).

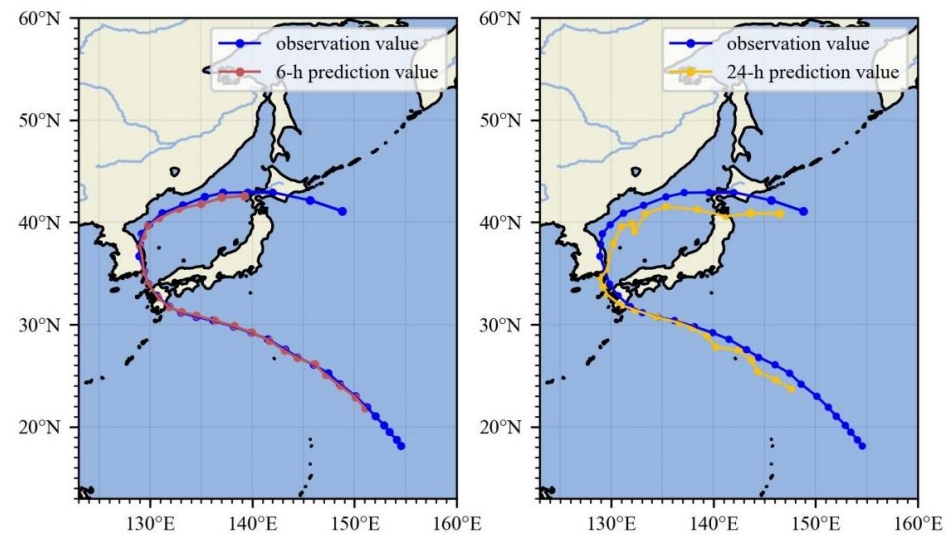

Fig. S6: Forecast tracks of Tropical Cyclone FRANCISCO (1908) (left: 6 h, right: 24 h).

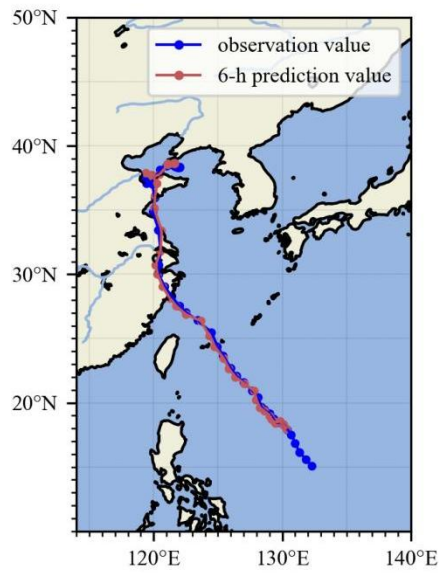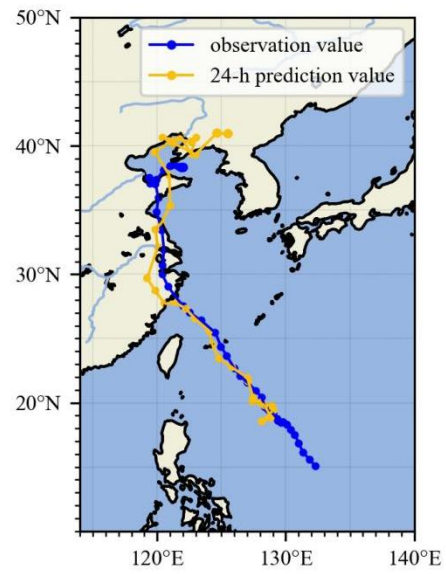

**Fig. S7: Forecast tracks of Tropical Cyclone LEKIMA (1909) (left: 6 h, right: 24 h).**

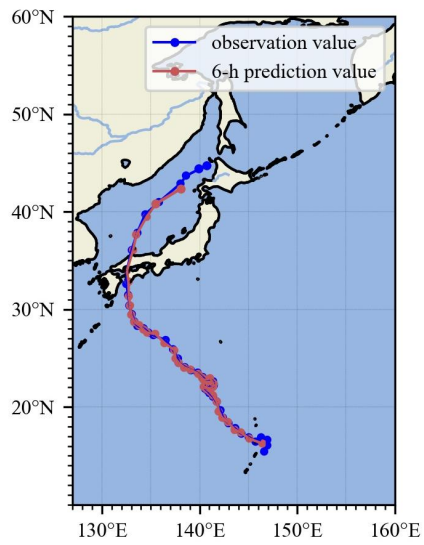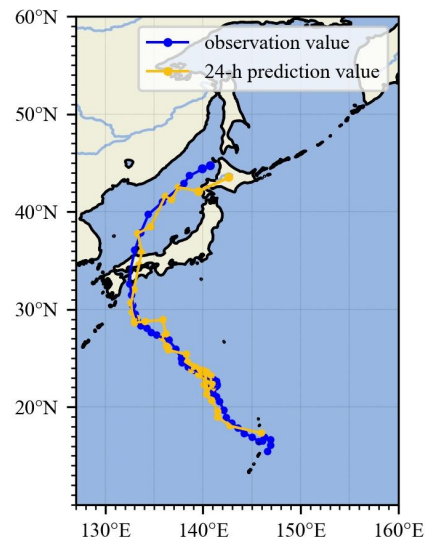

**Fig. S8: Forecast tracks of Tropical Cyclone KROSA (1910) (left: 6 h, right: 24h).**



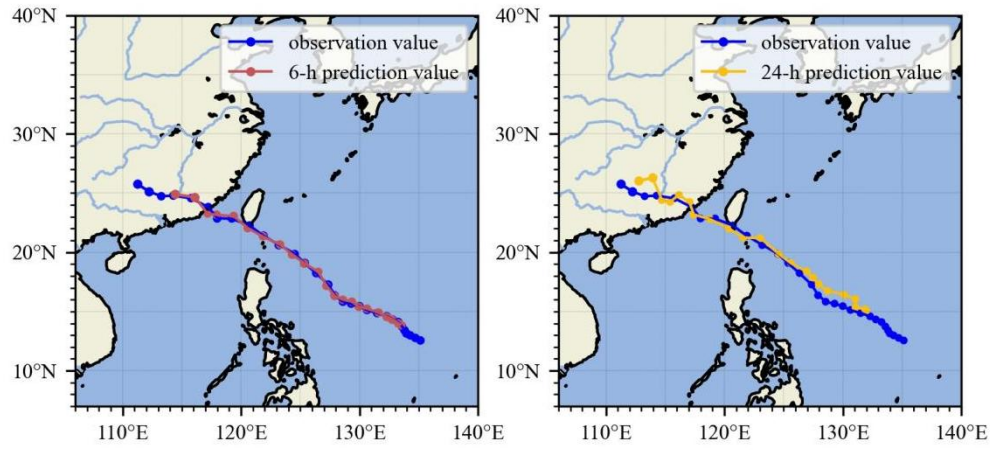

Fig. S9: Forecast tracks of Tropical Cyclone BAILU (2011) (left: 6 h, right: 24 h).

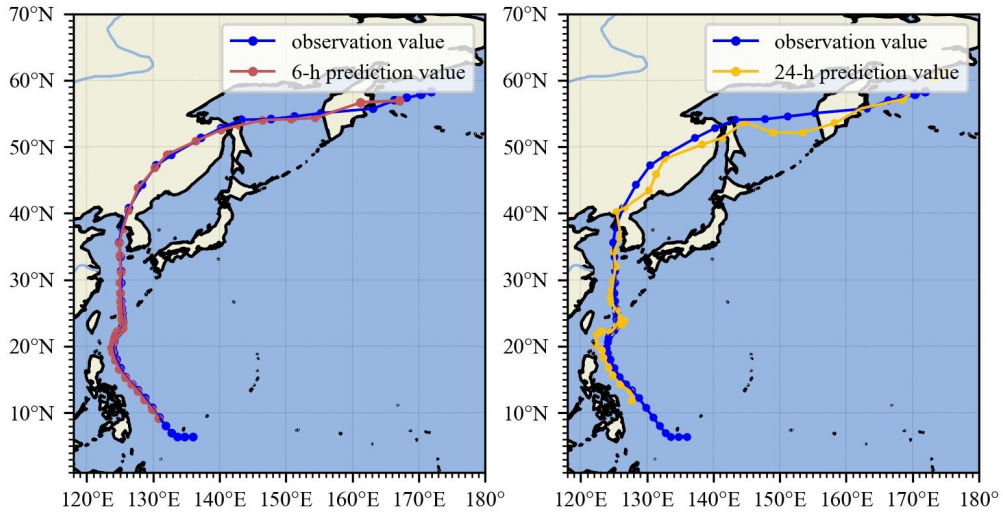

Fig. S10: Forecast tracks of Tropical Cyclone LINGLING (2013) (left: 6 h, right: 24 h).

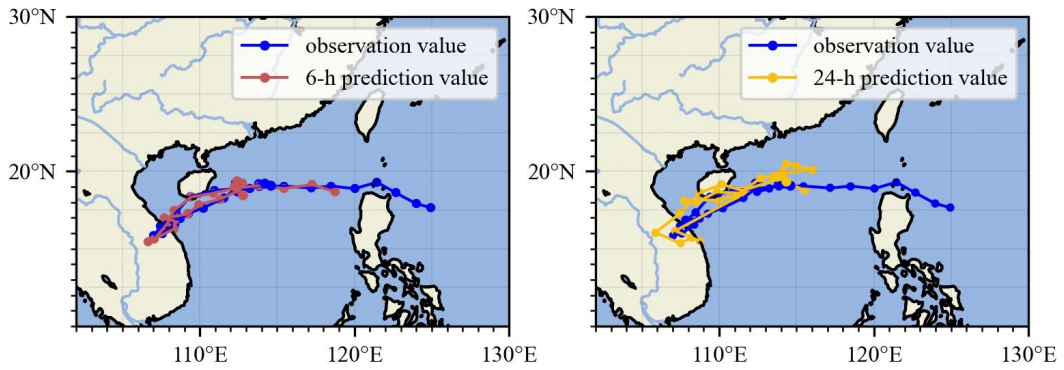

Fig. S11: Forecast tracks of Tropical Cyclone KAJIKI (2014) (left: 6 h, right: 24 h).

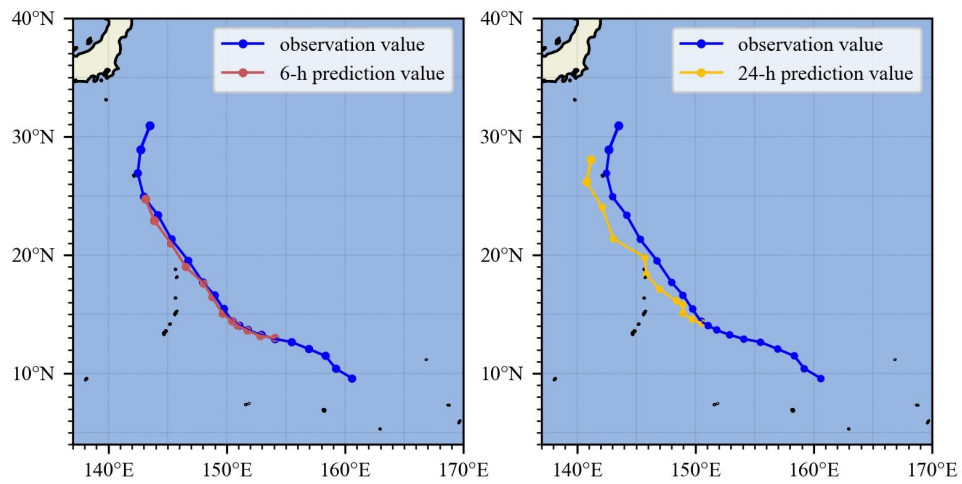

**Fig. S12: Forecast tracks of Tropical Cyclone PEIPAH (1916) (left: 6 h, right: 24 h).**

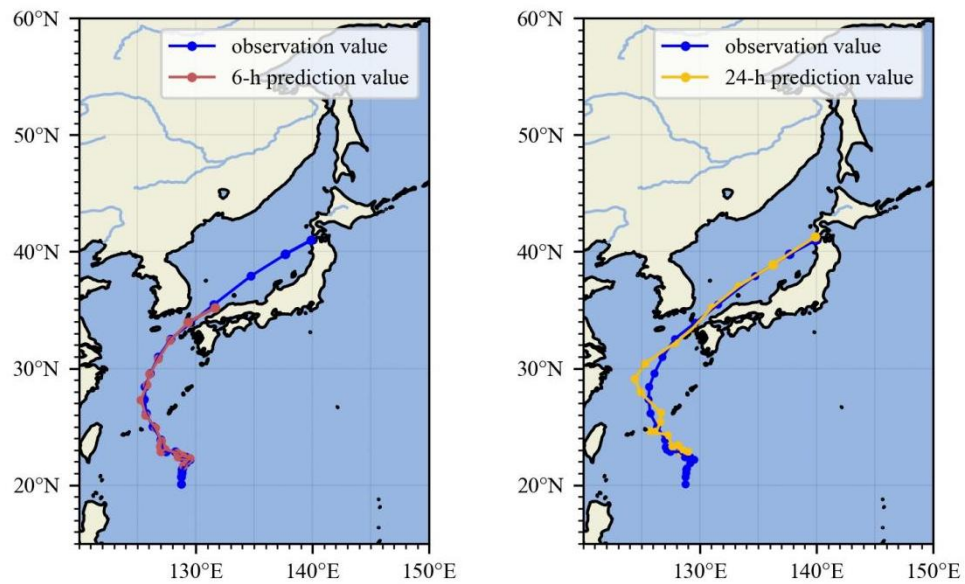

**Fig. S13: Forecast tracks of Tropical Cyclone TAPAH (1917) (left: 6 h, right: 24 h).**

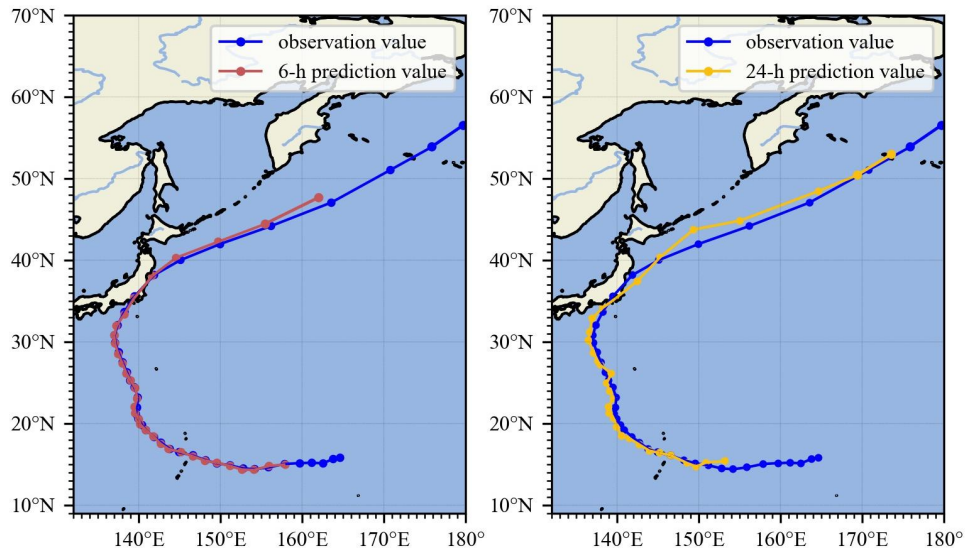

**Fig. S14: Forecast tracks of Tropical Cyclone HAGIBIS (1919) (left: 6 h, right: 24 h).**

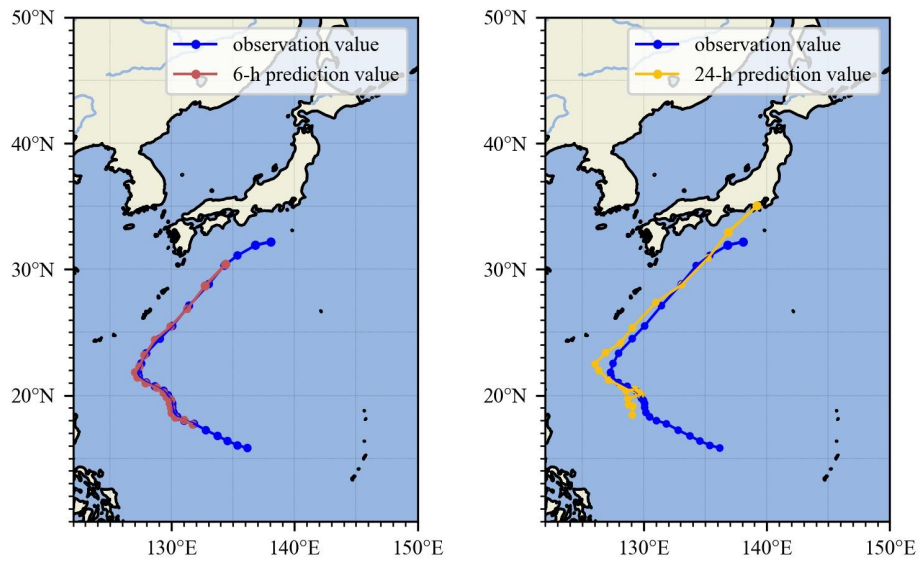

**Fig. S15: Forecast tracks of Tropical Cyclone NEOGURI (1920) (left: 6 h, right: 24 h).**

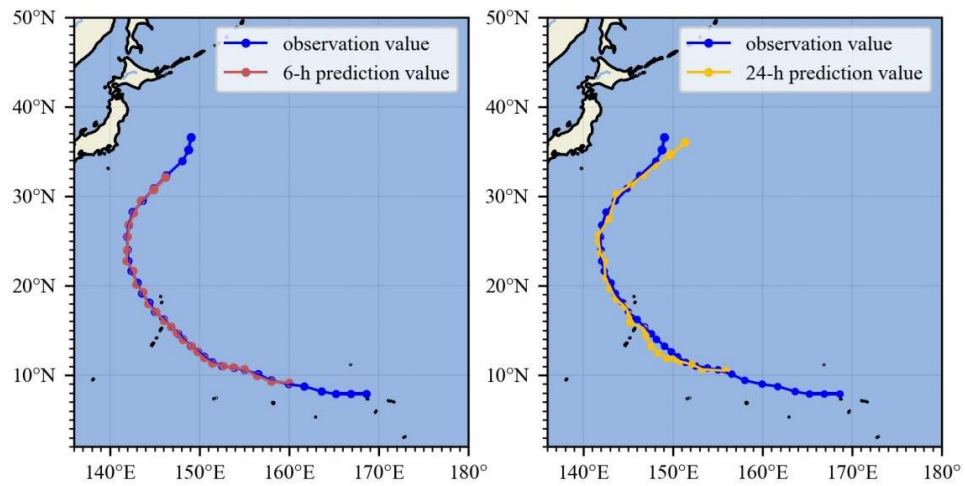

Fig. S16: Forecast tracks of Tropical Cyclone BUALOI (1921) (left: 6 h, right: 24 h).

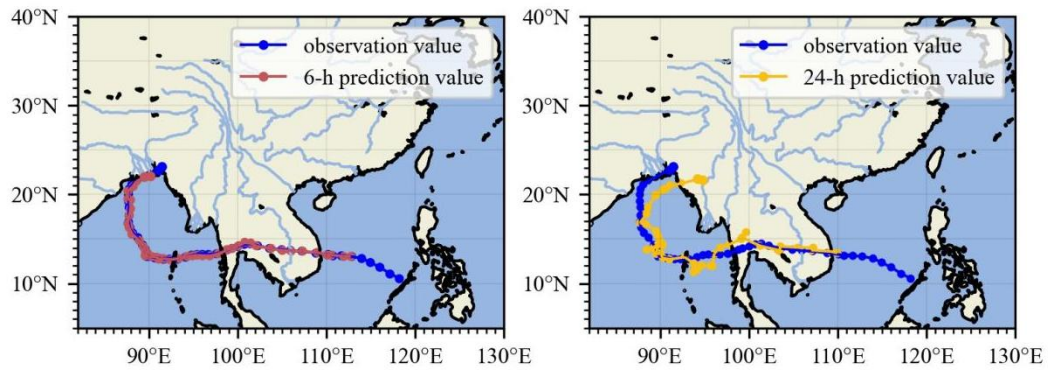

Fig. S17: Forecast tracks of Tropical Cyclone MATMO (1922) (left: 6 h, right: 24 h).

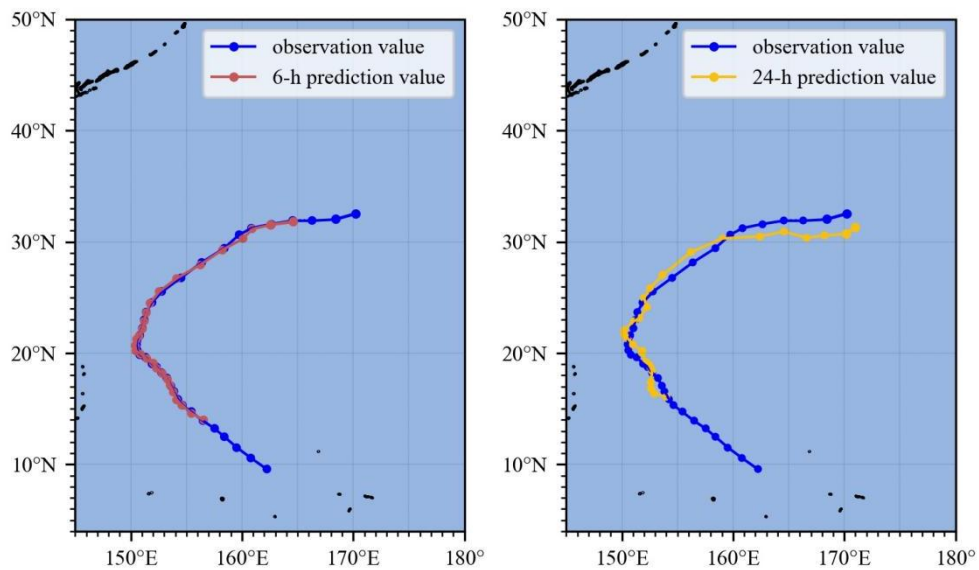

Fig. S18: Forecast tracks of Tropical Cyclone HALONG (1923) (left: 6 h, right: 24 h).



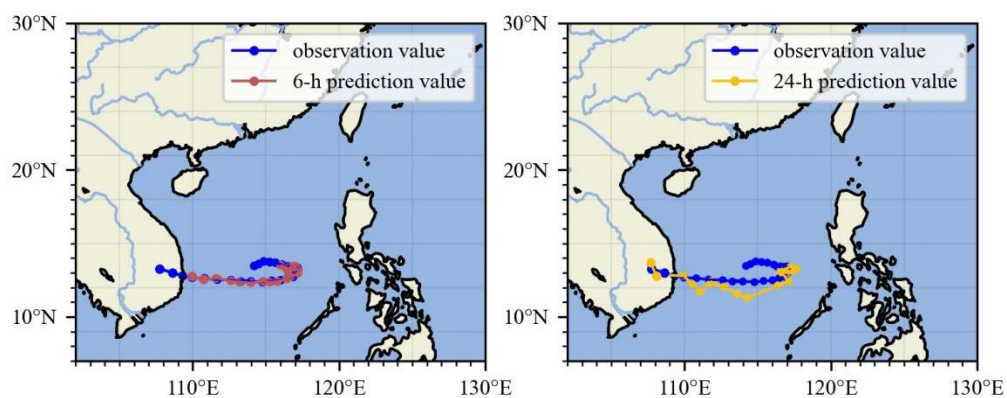

Fig. S19: Forecast tracks of Tropical Cyclone NAKRI (1924) (left: 6 h, right: 24 h).

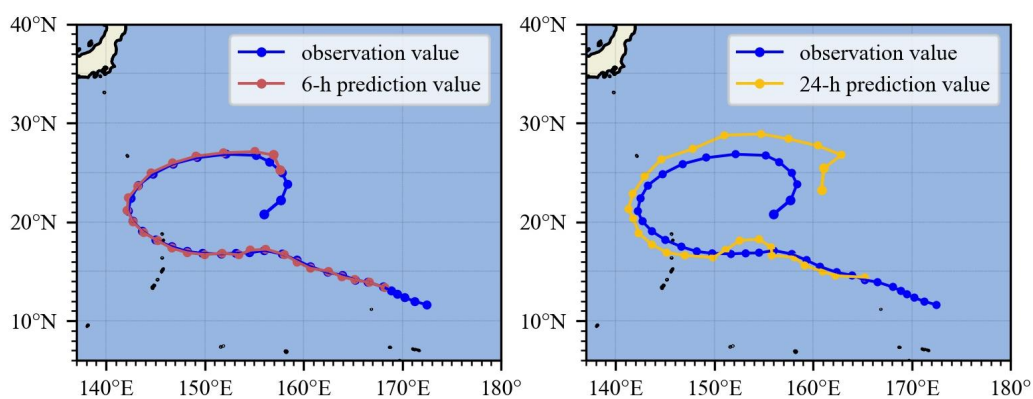

Fig. S20: Forecast tracks of Tropical Cyclone FENGSHEN (1925) (left: 6 h, right: 24 h).

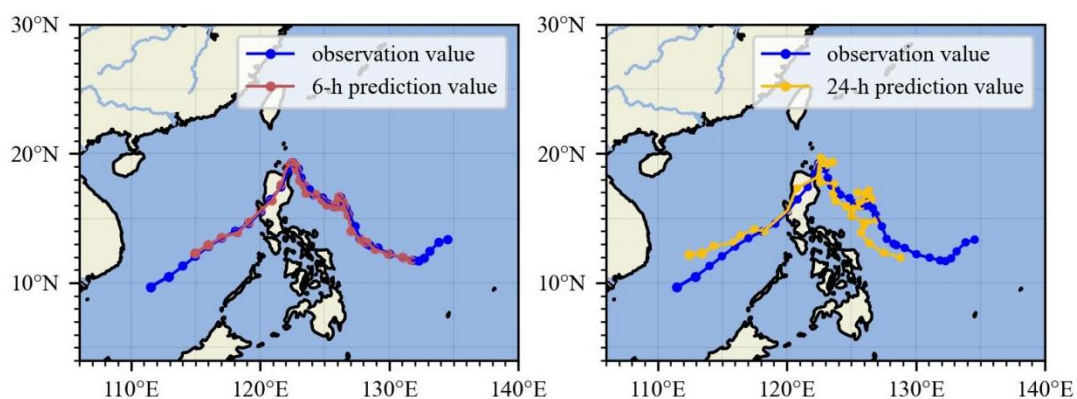

Fig. S21: Forecast tracks of Tropical Cyclone KALMAEGI (1926) (left: 6 h, right: 24 h).

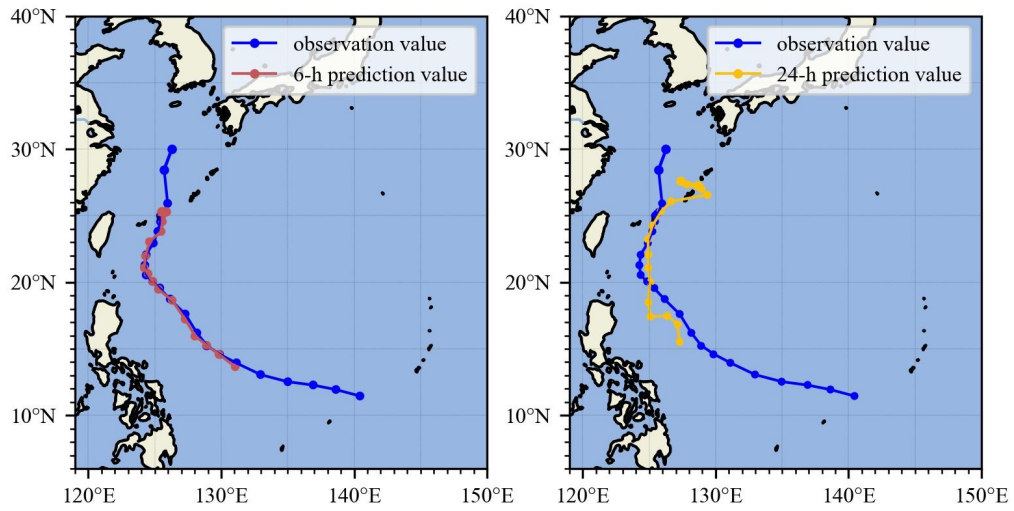

**Fig. S22: Forecast tracks of Tropical Cyclone FUNG-WONG (1927) (left: 6 h, right: 24 h).**

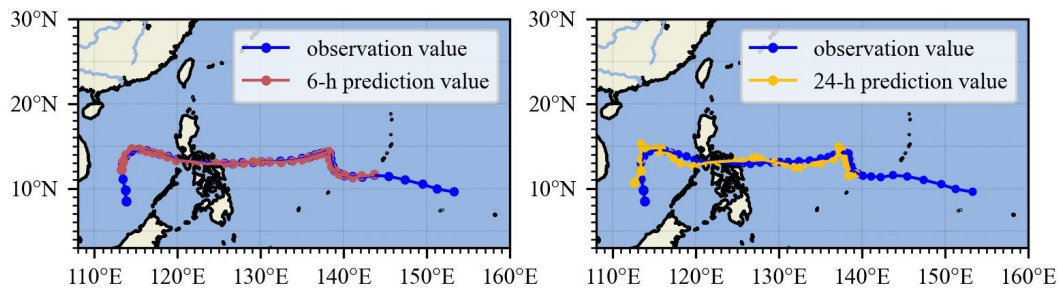

**Fig. S23: Forecast tracks of Tropical Cyclone KAMMURI (1928) (left: 6 h, right: 24 h).**

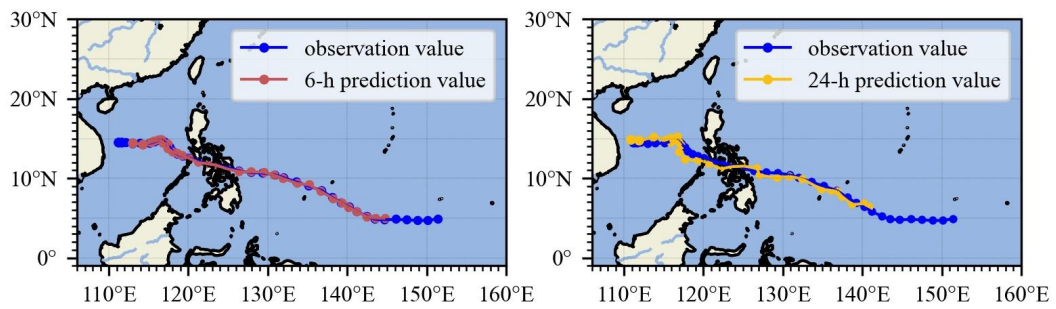

**Fig. S24: Forecast tracks of Tropical Cyclone PHANFONE (1929) (left: 6 h, right: 24 h).**

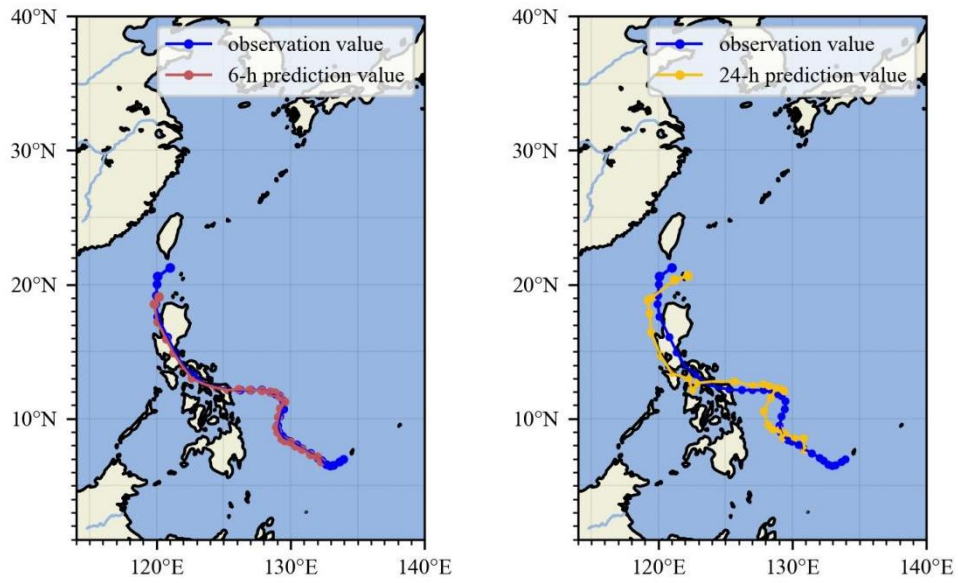

Fig. S25: Forecast tracks of Tropical Cyclone VONGFONG (2001) (left: 6 h, right: 24 h).

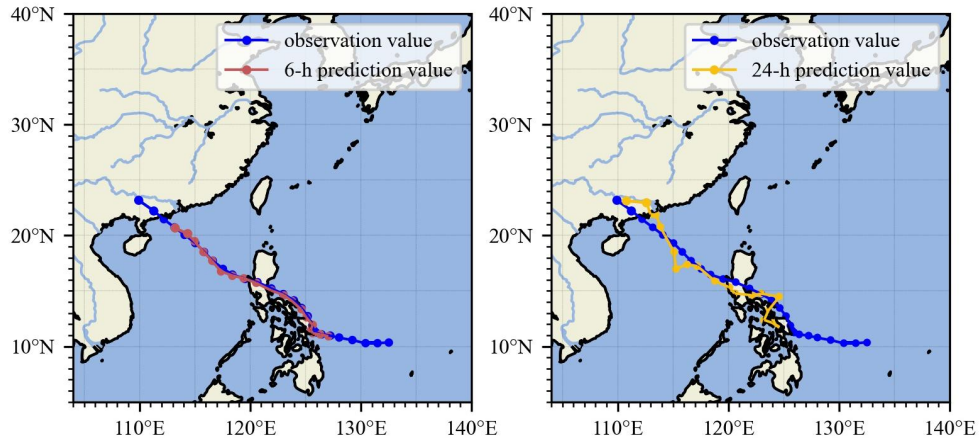

Fig. S26: Forecast tracks of Tropical Cyclone NURI (2002) (left: 6 h, right: 24 h).

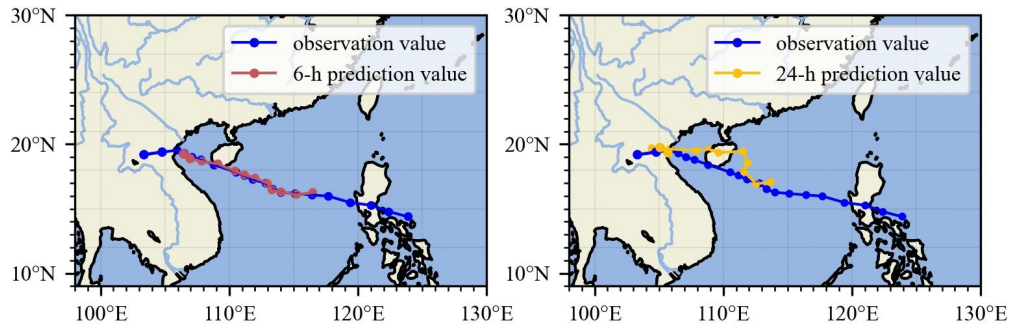

Fig. S27: Forecast tracks of Tropical Cyclone SINLAKU (2003) (left: 6 h, right: 24 h).

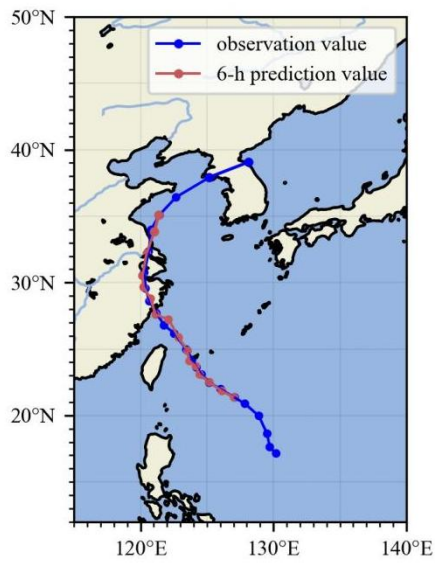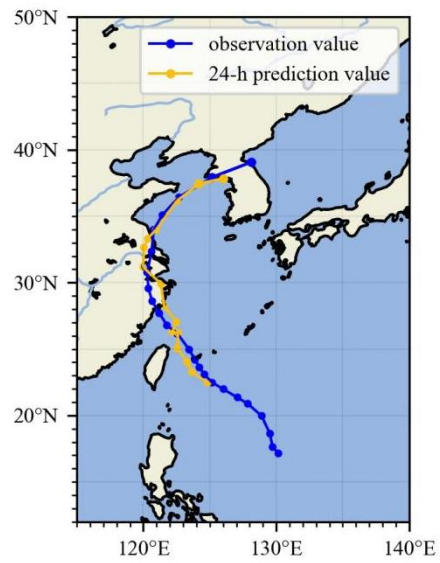

Fig. S28: Forecast tracks of Tropical Cyclone HAGUPIT (2004) (left: 6 h, right: 24 h).

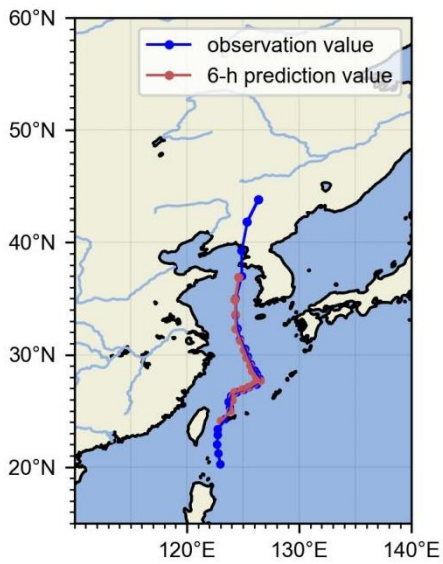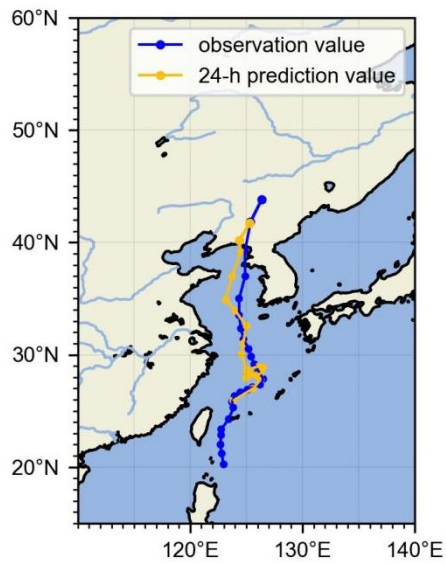

Fig. S29: Forecast tracks of Tropical Cyclone BAVI (2008) (left: 6 h, right: 24 h).



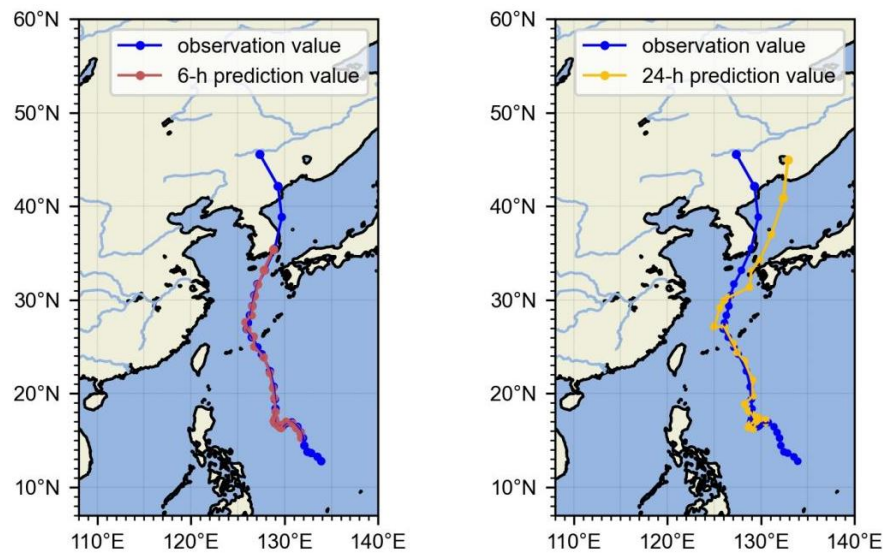

Fig. S30: Forecast tracks of Tropical Cyclone MAYSAK (2009) (left: 6 h, right: 24 h).

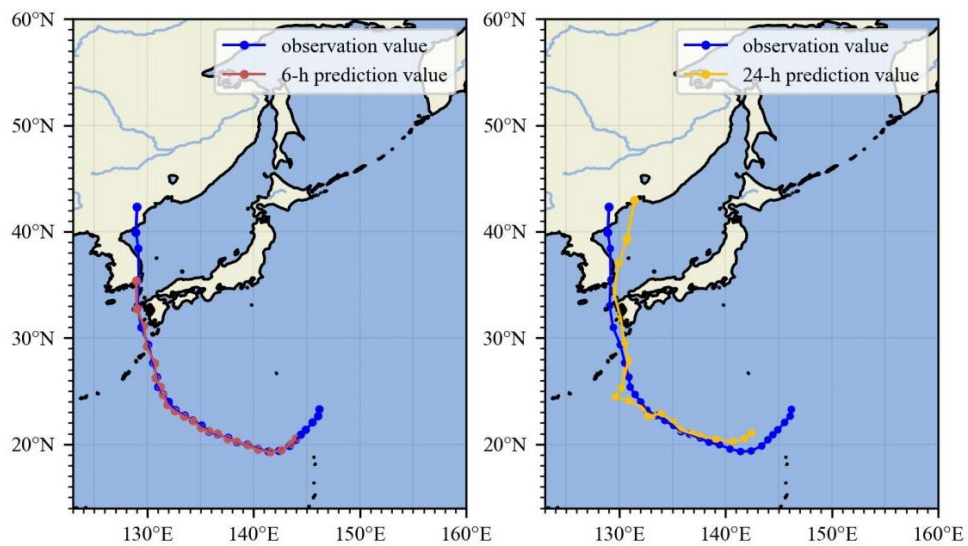

Fig. S31: Forecast tracks of Tropical Cyclone HAISHEN (2010) (left: 6 h, right: 24 h).

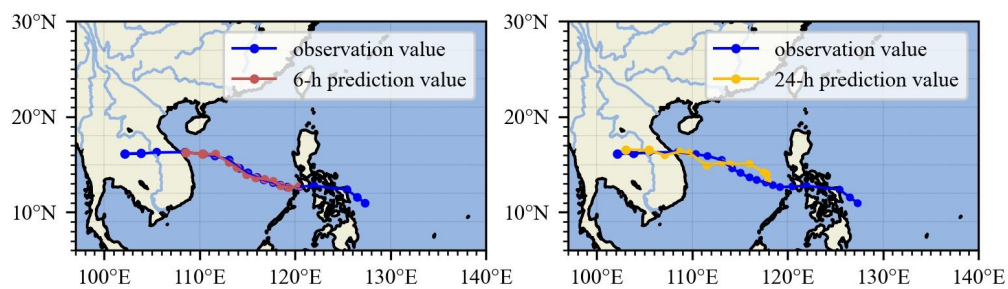

Fig. S32: Forecast tracks of Tropical Cyclone NOUL (2011) (left: 6 h, right: 24 h).



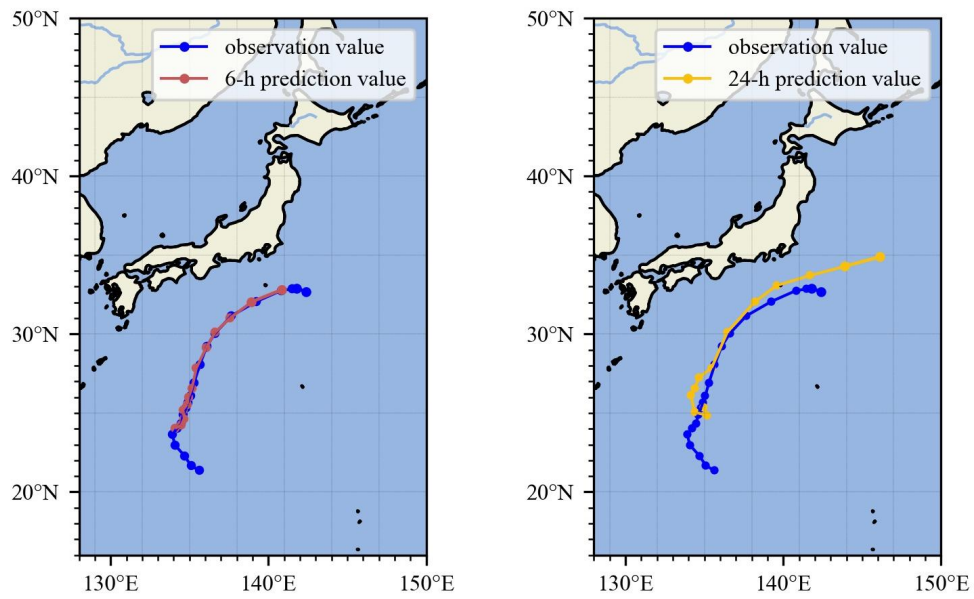

65

66 **Fig. S33: Forecast tracks of Tropical Cyclone DOLPHIN (2012) (left: 6 h, right: 24 h).**

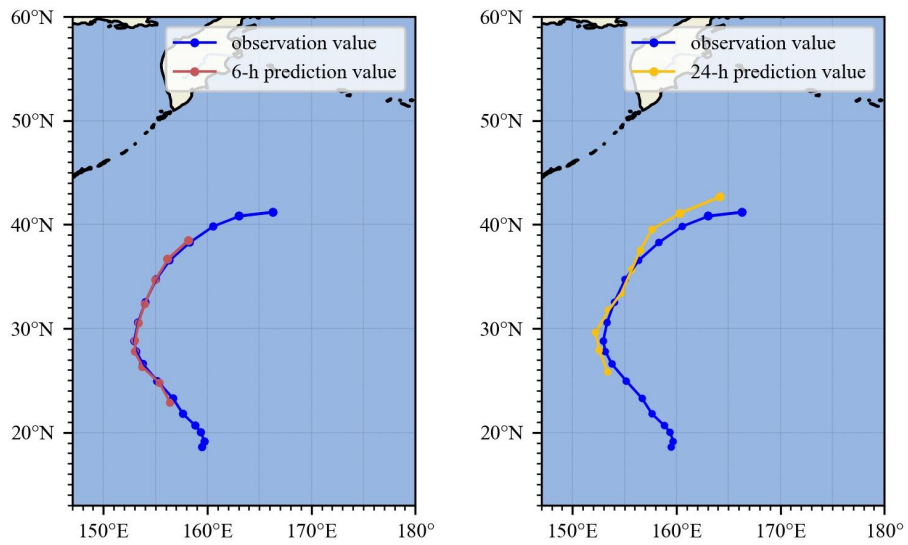

67

68 **Fig. S34: Forecast tracks of Tropical Cyclone KUJIRA (2013) (left: 6 h, right: 24 h).**

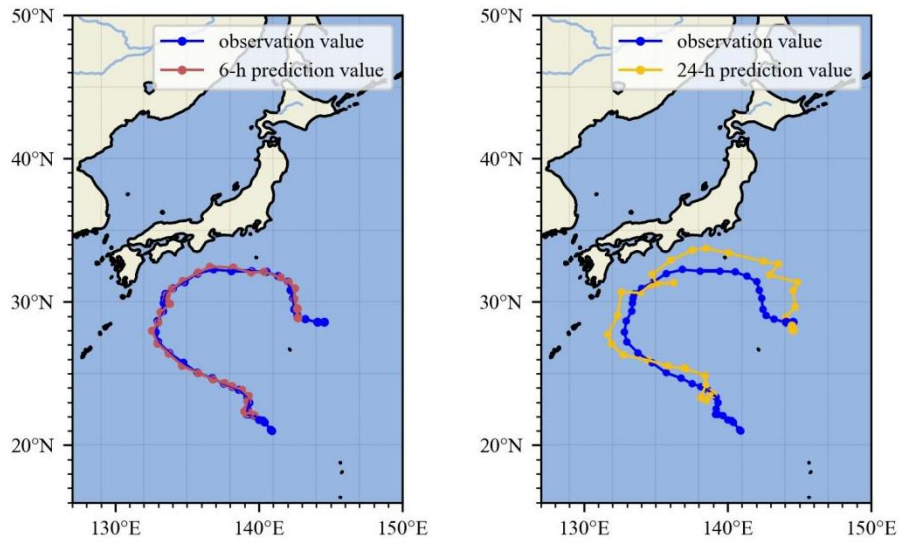

Fig. S35: Forecast tracks of Tropical Cyclone CHAN-HOM (2014) (left: 6 h, right: 24 h).

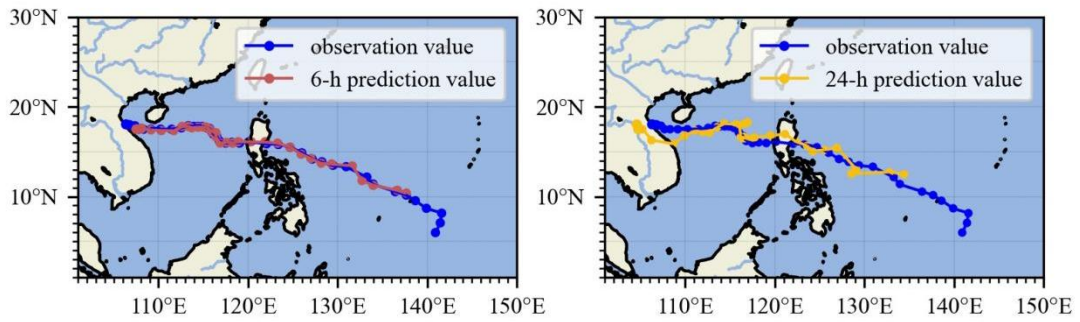

Fig. S36: Forecast tracks of Tropical Cyclone SAUDEL (2017) (left: 6 h, right: 24 h).

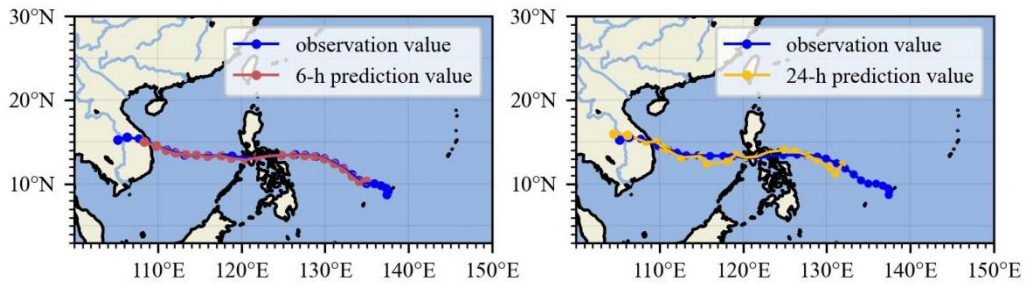

Fig. S37: Forecast tracks of Tropical Cyclone MOLAVE (2018) (left: 6 h, right: 24 h).

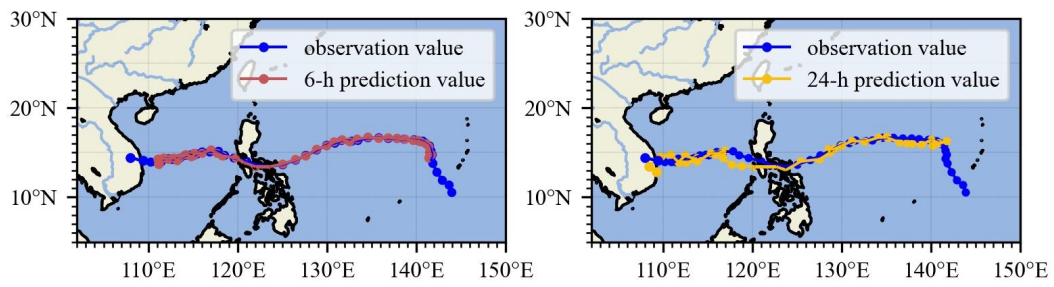

**Fig. S38: Forecast tracks of Tropical Cyclone GONI (2019) (left: 6 h, right: 24 h).**

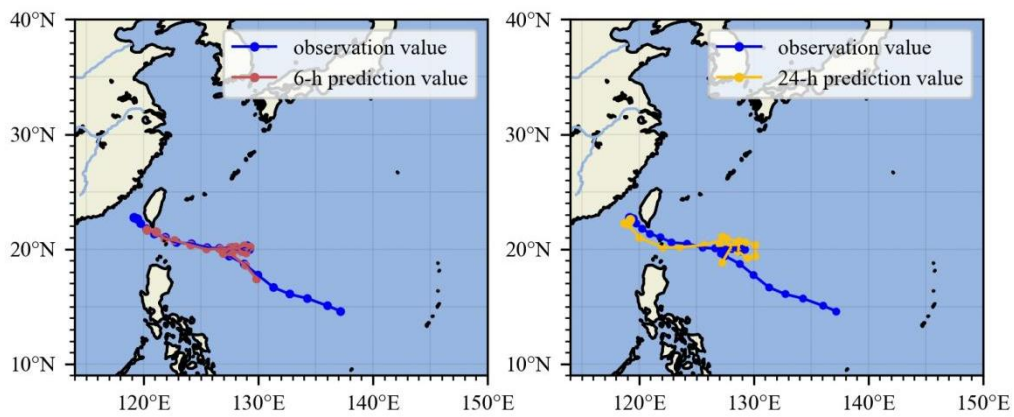

**Fig. S39: Forecast tracks of Tropical Cyclone ATSANI (2020) (left: 6 h, right: 24 h).**

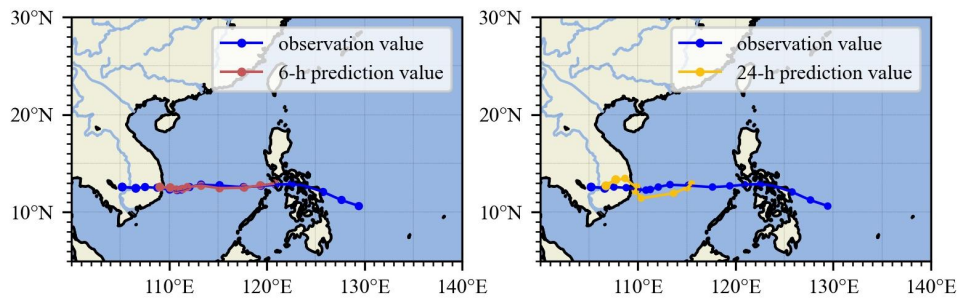

**Fig. S40: Forecast tracks of Tropical Cyclone ETAU (2021) (left: 6 h, right: 24 h).**

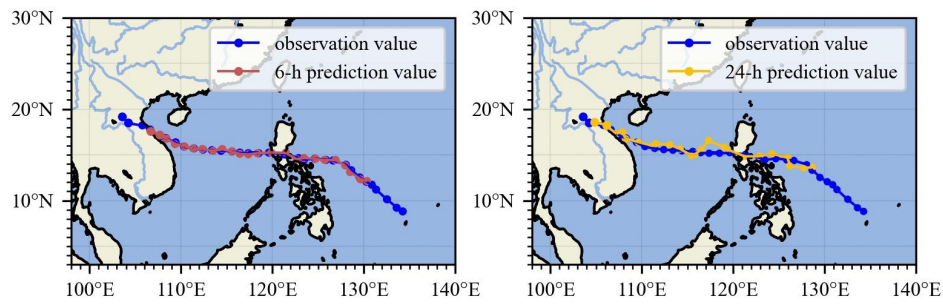

Fig. S41: Forecast tracks of Tropical Cyclone VAMCO (2022) (left: 6 h, right: 24 h).

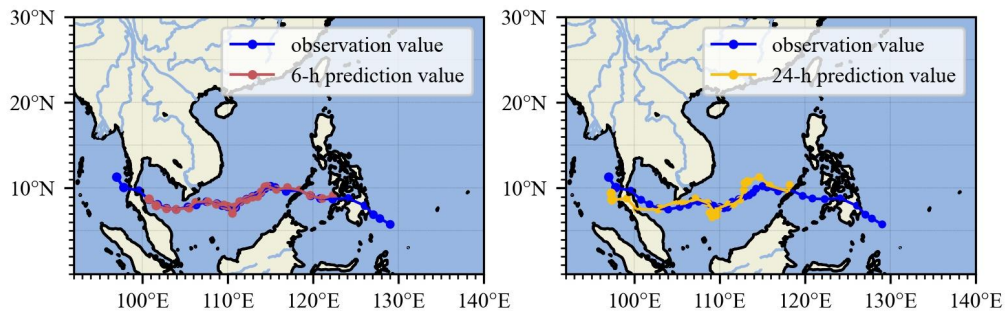

Fig. S42: Forecast tracks of Tropical Cyclone KROVANH (2023) (left: 6 h, right: 24 h).

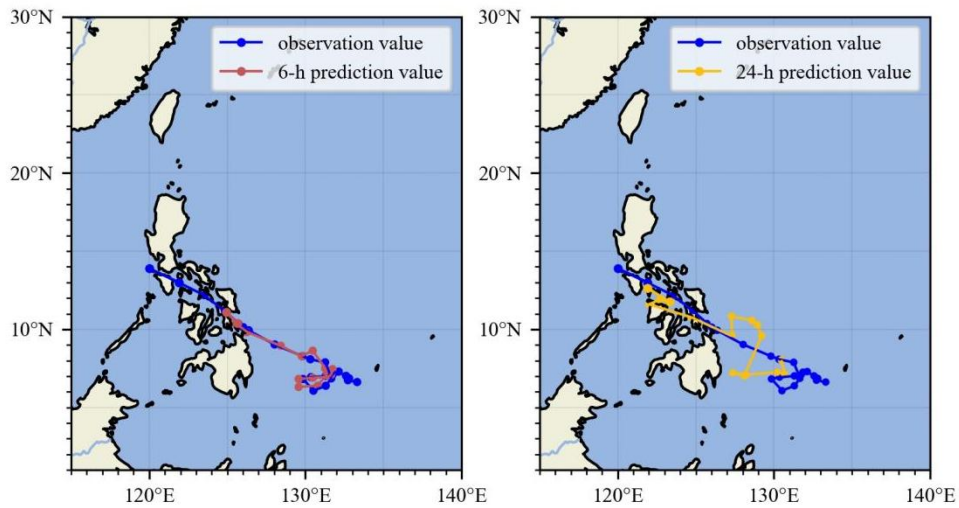

Fig. S43: Forecast tracks of Tropical Cyclone DUJUAN (2101) (left: 6 h, right: 24 h).



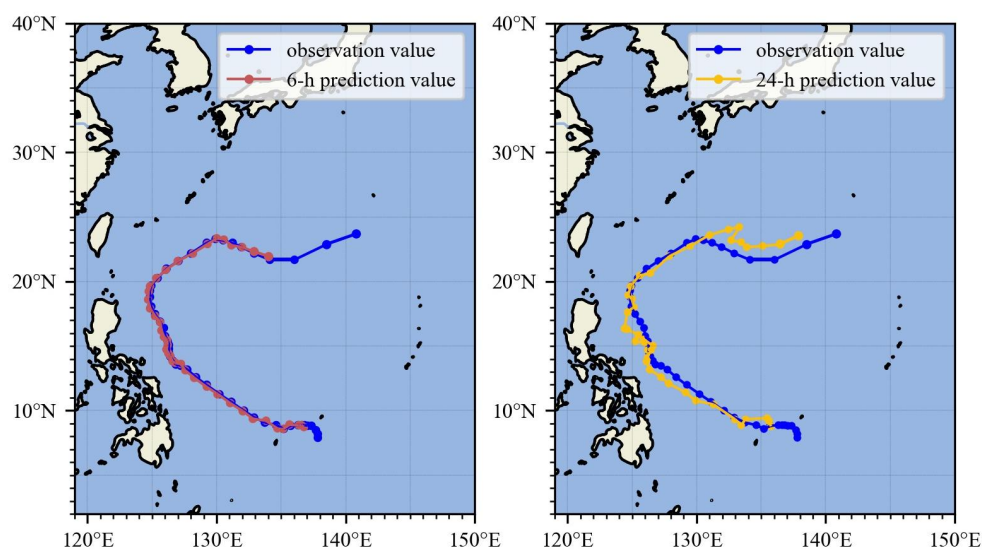

Fig. S44: Forecast tracks of Tropical Cyclone SURIGA (2102) (left: 6 h, right: 24 h).

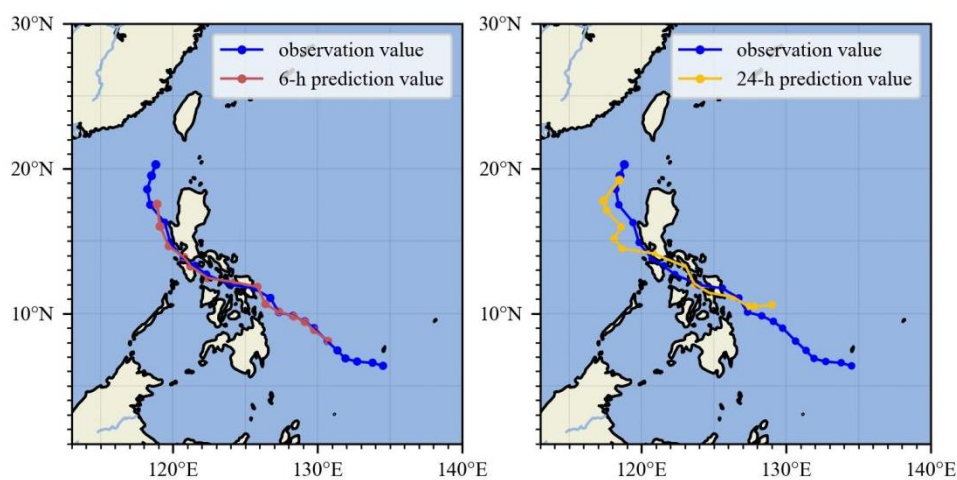

Fig. S45: Forecast tracks of Tropical Cyclone CHOI-WAN (2103) (left: 6 h, right: 24 h).

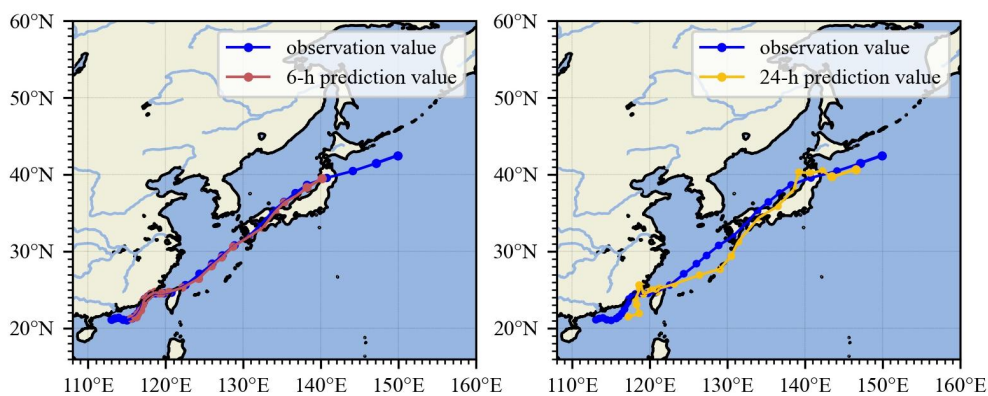

Fig. S46: Forecast tracks of Tropical Cyclone LUPIT (2109) (left: 6 h, right: 24 h).



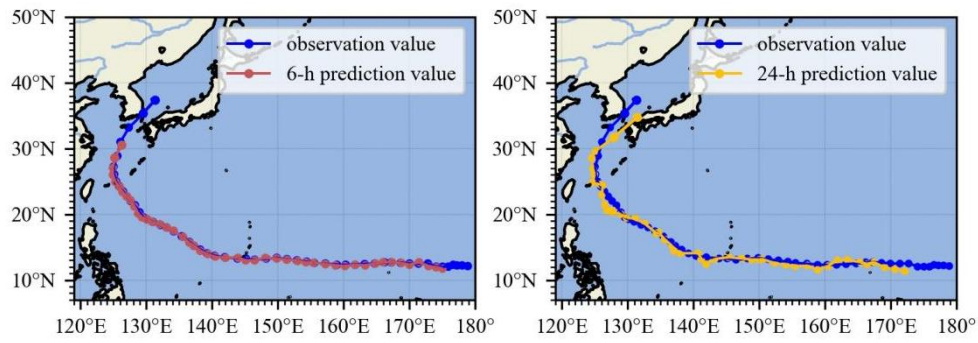

Fig. S47: Forecast tracks of Tropical Cyclone OMAIS (2112) (left: 6 h, right: 24 h).

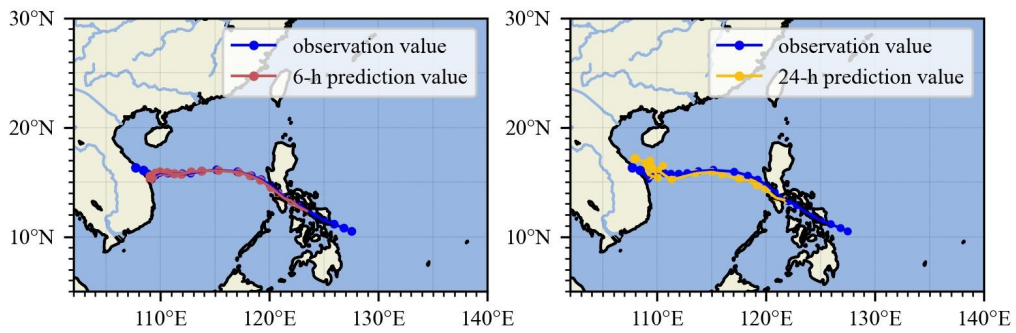

Fig. S48: Forecast tracks of Tropical Cyclone CONSON (2113) (left: 6 h, right: 24 h).

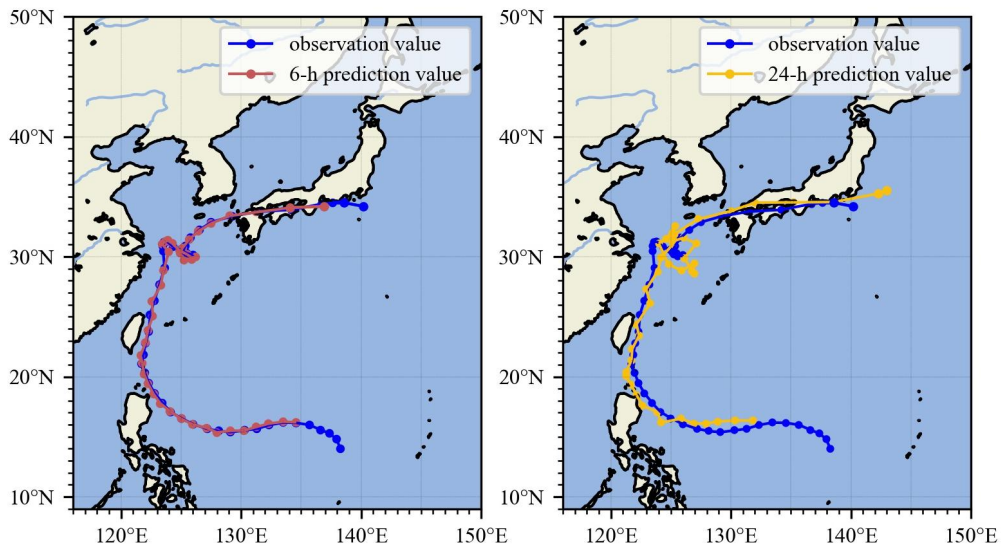

Fig. S49: Forecast tracks of Tropical Cyclone CHANTHU (2114) (left: 6 h, right: 24 h).

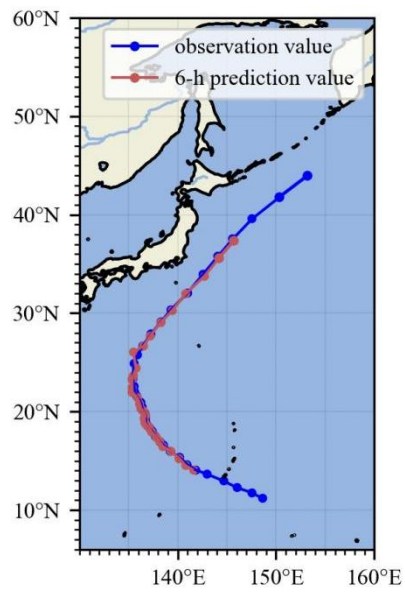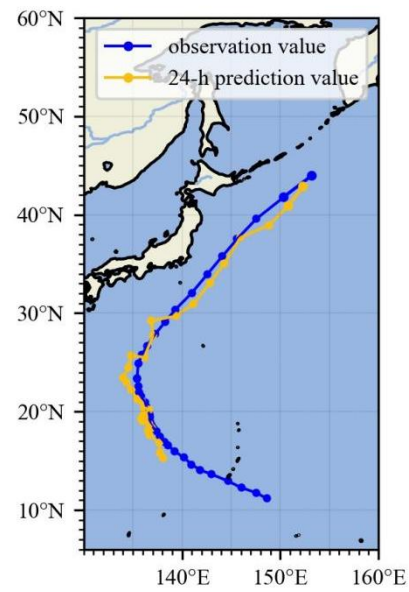

99

100 **Fig. S50: Forecast tracks of Tropical Cyclone MINDULLE (2116) (left: 6 h, right: 24 h).**

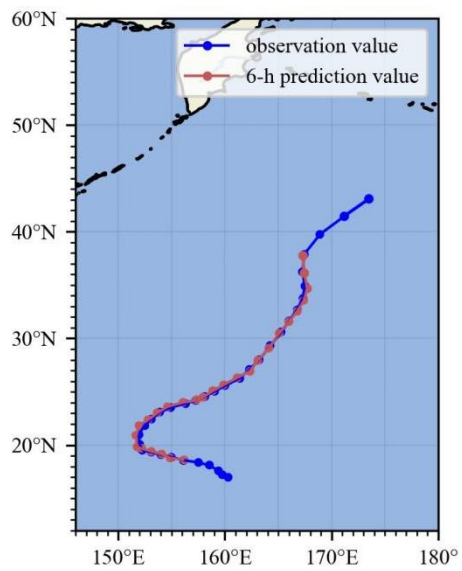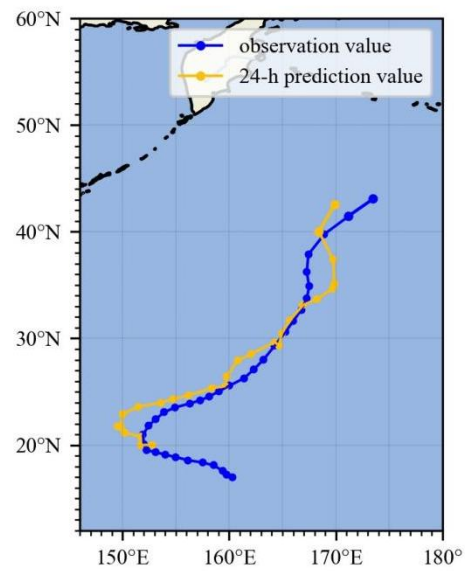

101

102 **Fig. S51: Forecast tracks of Tropical Cyclone NAMTHEUN (2119) (left: 6 h, right: 24 h).**
